# Supplementary material for: DNA methylome and transcriptome sequencing in human ovarian granulosa cells links age-related changes in gene expression to gene body methylation and 3ʹ-end GC density
Source: PubMed Central journal article supplement (PMC4414142; doi:10.18632/oncotarget.2875), 2015-02-17
Supplement: oncotarget-06-3627-s001.pdf [file oncotarget-06-3627-s001.pdf]

SUPPLEMENTARY FIGURES

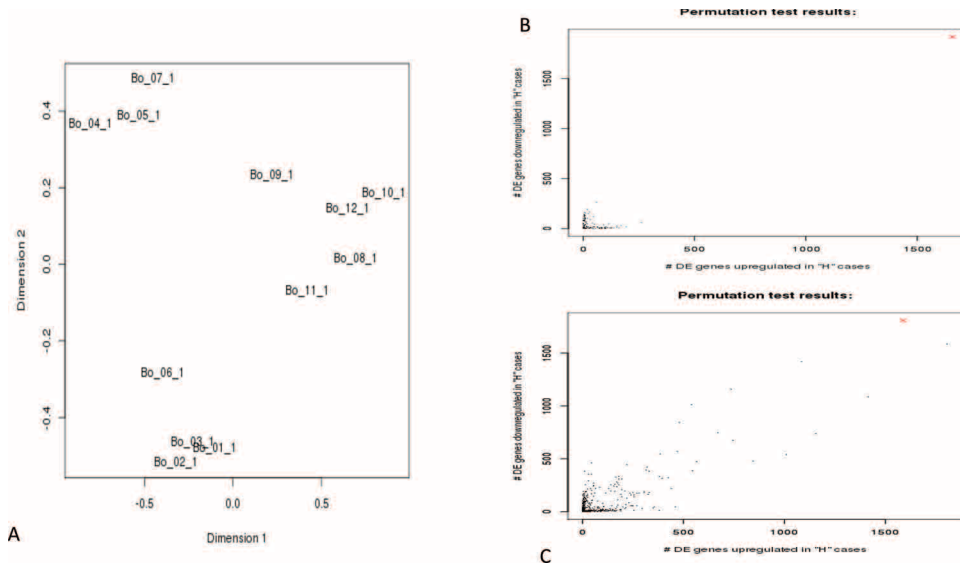

**Supplementary Figure S1: Differences in mRNA-seq profiles are due to biological differences between the two groups.** (A) Multi-dimensional scaling plot: The 12 individuals clustered into two groups that are consistent with their differences in age-related ovarian functions, except for one sample. (B) Balanced and (C) unbalanced permutation test showed that the highest number of differentially expressed genes was generated from the combination of experimental groups, rather than from other random combinations.

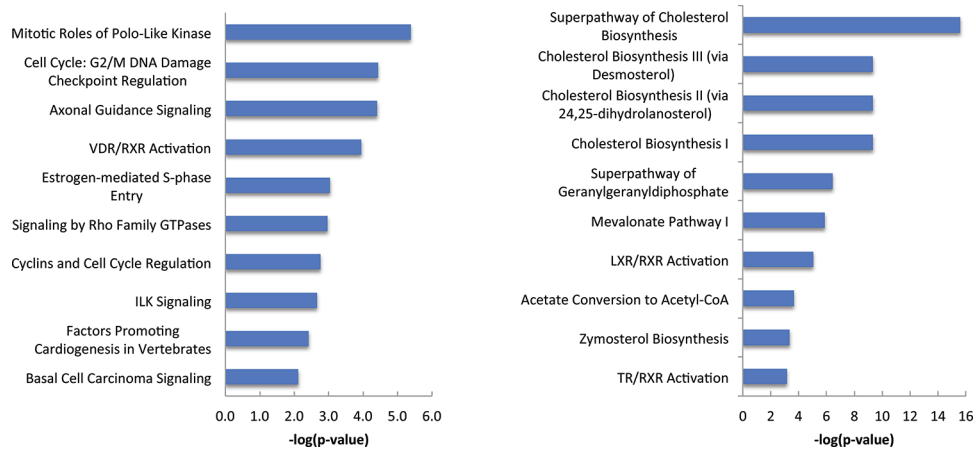

**Supplementary Figure S2: Top 10 pathways that differentially expressed genes utilized (IPA Software, //www.ingenuity.com).** Pathways involving genes with decreased (left) and increased (right) expression in poor responders.

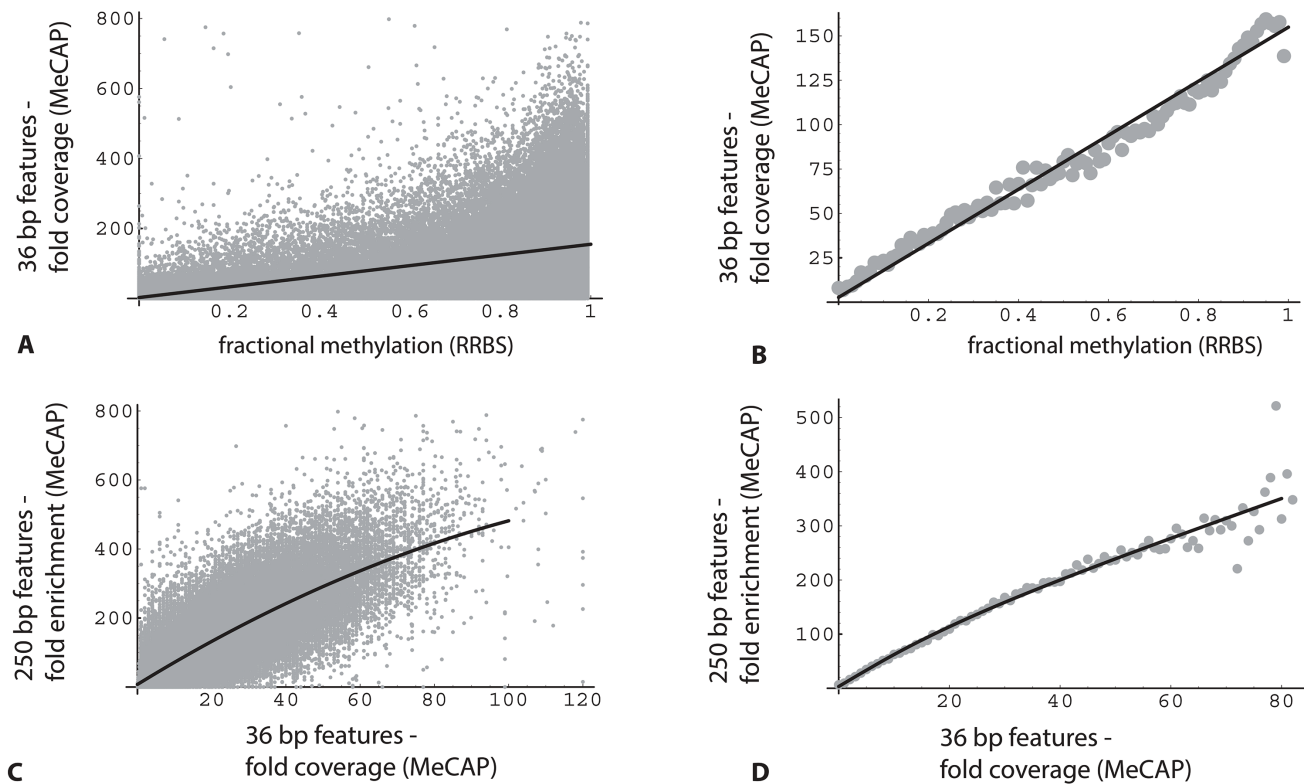

**Supplementary Figure S3: Interrelationships between the bisulfite- and affinity-enrichment- based approaches (A)**

Each dot is a 36 bp region with RRBS data localized within MeCAP peaks. X-axis: average level of methylation in RRBS datasets. Y-axis: average fold coverage of each region in MethylCap-seq datasets. **(B)** Each dot is a 36 bp region with coverage in all MethylCap-seq and RRBS datasets. X-axis and Y-axis are the same as in A). **(C)** Each dot is a 36 bp region with RRBS data localized within MeCAP peaks. X-axis: average fold coverage of each region in MethylCap-seq datasets. Y-axis: average fold coverage (or enrichment) in the 250 bp sliding window that encompasses each 36 bp region. **(D)** Each dot is a 36 bp region with coverage in all MethylCap-seq and RRBS datasets. X-axis and Y-axis are the same as in A).

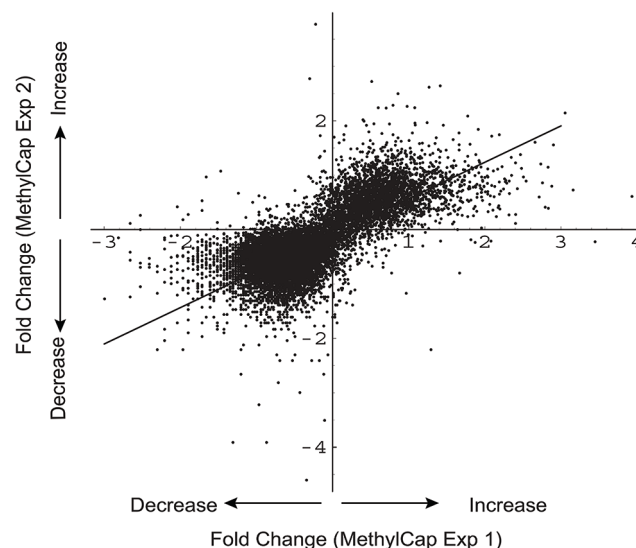

**Supplementary Figure S4: Experimental agreement of MeCap-seq data.** The first and second experiments were drawn from independent sets of individuals. Each dot represents a 250-bp region that exhibited differential methylation between oocyte donors and poor responders ( $n = 16377$ ).

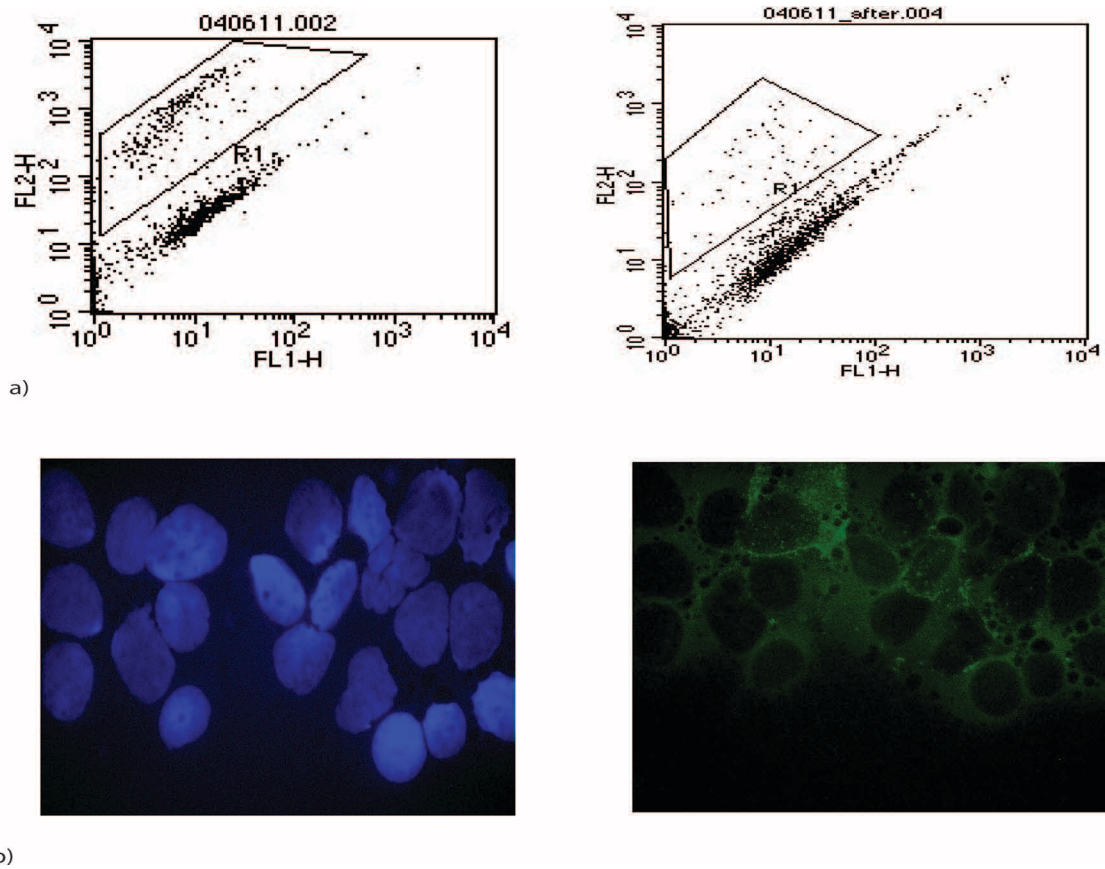

**Supplementary Figure S5: Purification of granulosa cells.** (a) FACS analysis of a granulosa cell sample before (left) and after (right) depletion using anti-CD45 labeled magnetic beads. Gated regions show that the percentage of leucocyte impurity decreases from 14% to 0.4%. (b) Immunofluorescent staining of a purified granulosa cell sample with DAPI (left) and granulosa cell specific FITC-labeled anti-FSHR antibody (right).

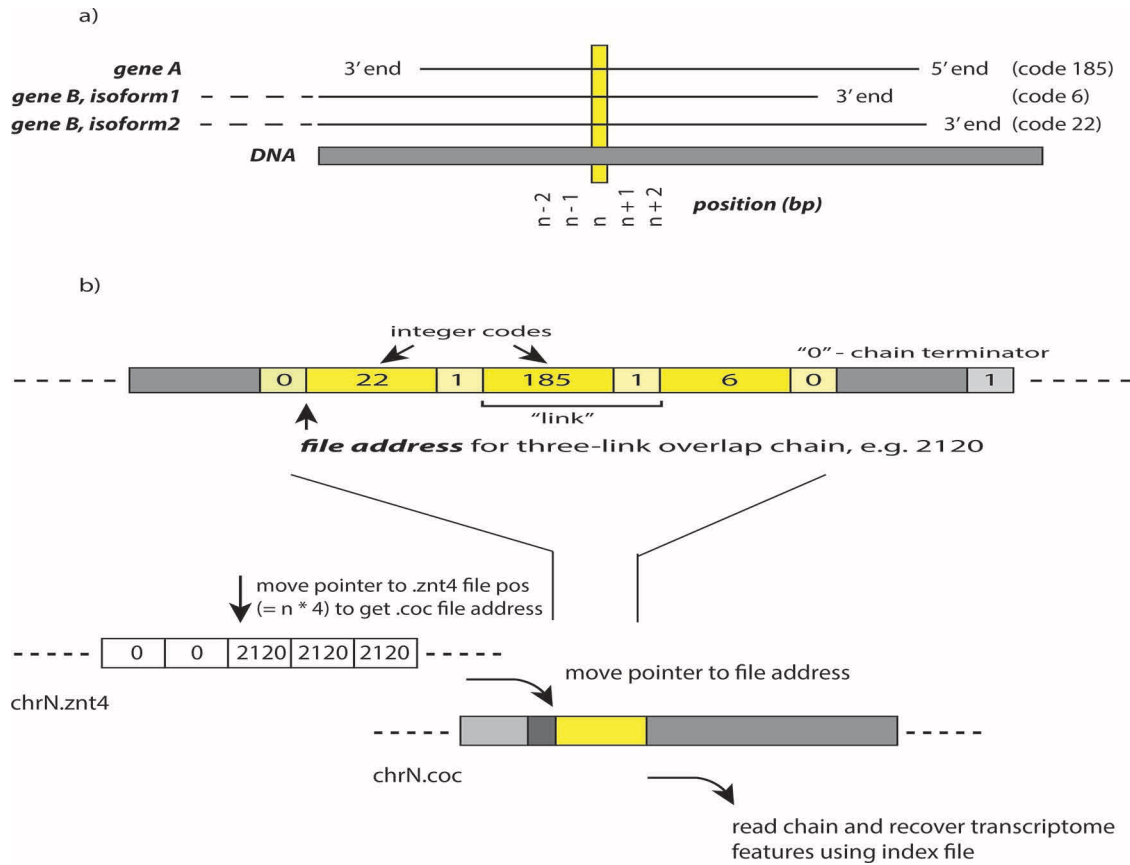

**Supplementary Figure S6: Schematic for computer algorithms used to overlap multiple features at each genomic location.** (a) An example of a genomic location (n) and its multiple associated features, such as gene A, gene B isoform 1, gene B isoform 2. Each feature is assigned with an integer code, such as 185, 6, 22, respectively, in the concatenated annotation file. (b) The set of algorithms for locating n and recovering its associated features. Three files are needed: annotation file (znt4), concatenated file (coc), and index file.

- Step 1. Move file pointer to chrN.znt4 file position ( = n\*4), to get address in chrN.coc file, eg. 2120.
- Step 2. In chrN.coc file, move pointer to file address 2120, which is associated with a 3-link chain. Each link represents a feature. Two links are separated by an integer "1". Two chains are separated by an interger "0".
- Step 3. Using index file, the integer codes recovered from Step 2 can be related to respective features.
